# Supplementary material for: In Silico Drug Repurposing Framework Predicts Repaglinide, Agomelatine and Protokylol as TRPV1 Modulators with Analgesic Activity
Source: MDPI journal article supplement (doi:10.3390/pharmaceutics14122563), 2022-11-22
Supplement: s1 [file s1]

# Supplementary Materials: In Silico Drug Repurposing Framework Predicts Repaglinide, Agomelatine and Protokylol as TRPV1 Modulators with Analgesic Activity

Corina Andrei, Dragos Paul Mihai, Anca Zanzfirescu, George Mihai Nitulescu and Simona Negres

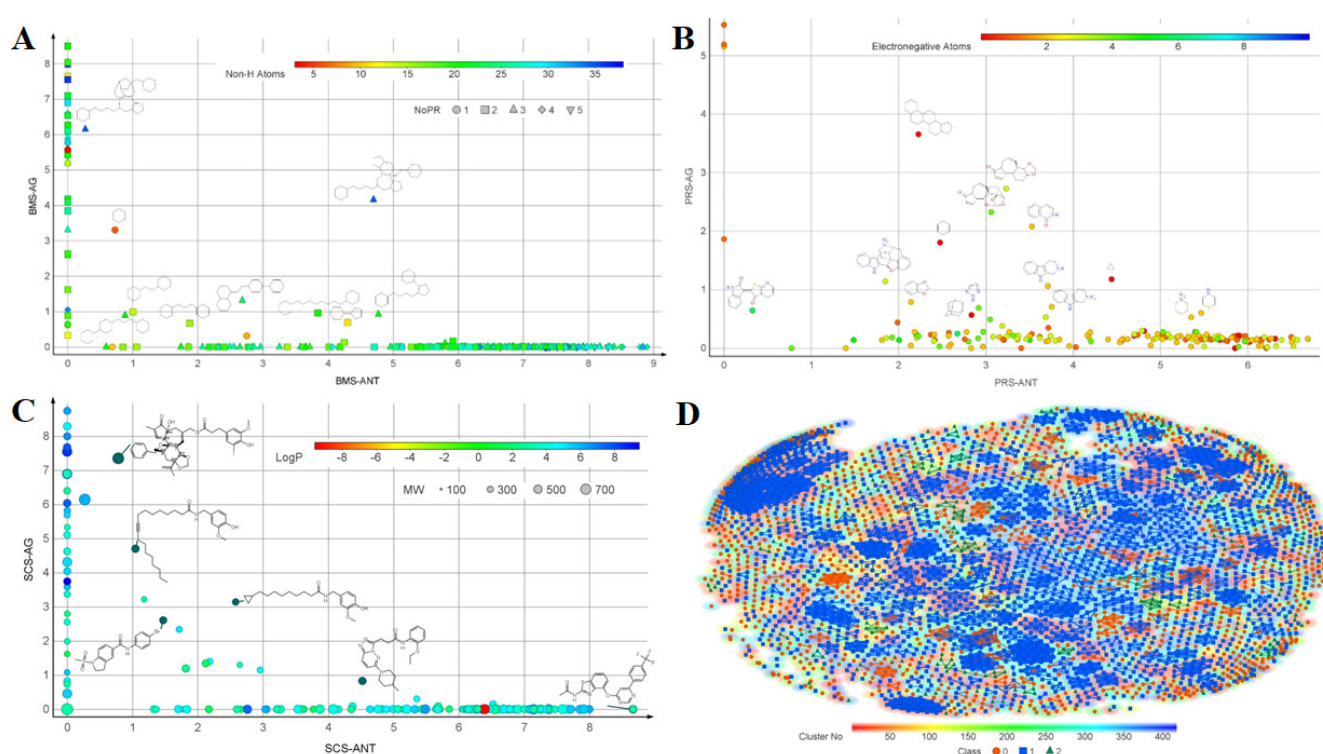

**Figure S1.** (A) Relationship between BM scores for predicting antagonists and agonists; (B) relationship between PR scores for predicting antagonists and agonists; (C) relationship between SC scores for predicting antagonists and agonists (representative structures are highlighted); (D) map of structure similarity relationships based on flexophores for TRPV1 antagonists (class 1), agonists (class 2) and inactive molecules (class 0).

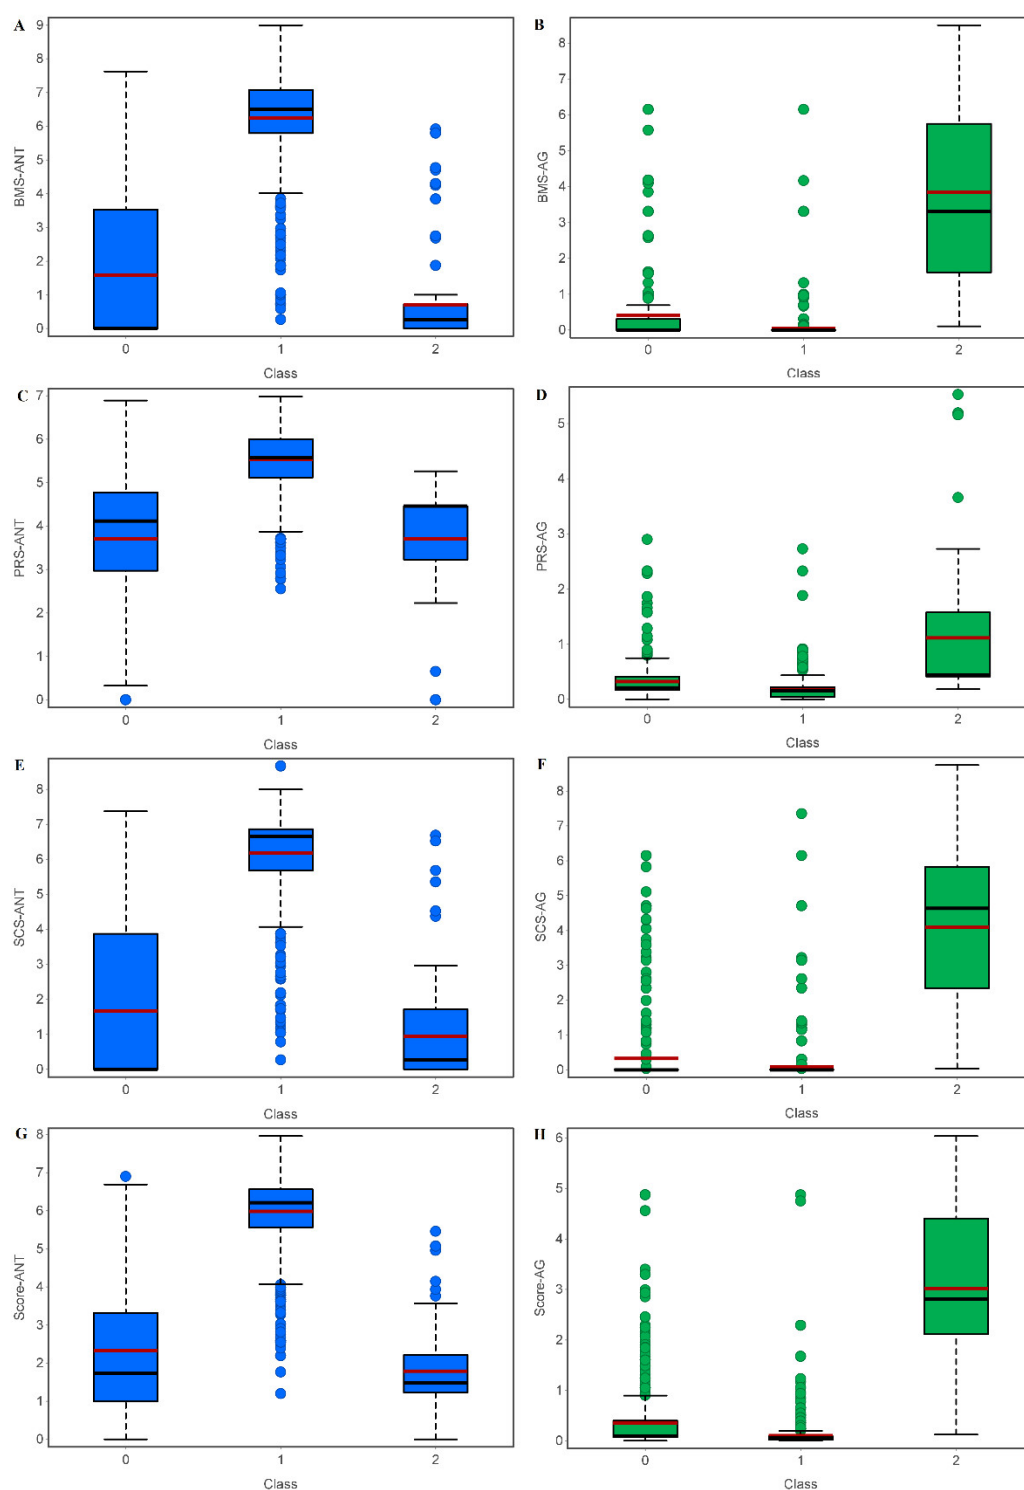

**Figure S2.** Box plots representing activity scores established based on structural features for both antagonists and agonists. **(A)** Bemis-Murcko activity scores for predicting antagonists (BMS-ANT); **(B)** Bemis-Murcko activity scores for predicting agonists (BMS-AG); **(C)** plain rings activity scores for predicting antagonists (PRS-ANT); **(D)** plain rings activity scores for predicting agonists (PRS-AG); **(E)** flexophore similarity cluster activity scores for predicting antagonists (SCS-ANT); **(F)** flexophore similarity cluster activity scores for predicting agonists (SCS-AG); **(G)** average activity scores for predicting antagonists (Score-ANT); **(H)** average activity scores for predicting agonists (Score-AG); class 0 – inactive molecules, class 1 – antagonists, class 2 – agonists.

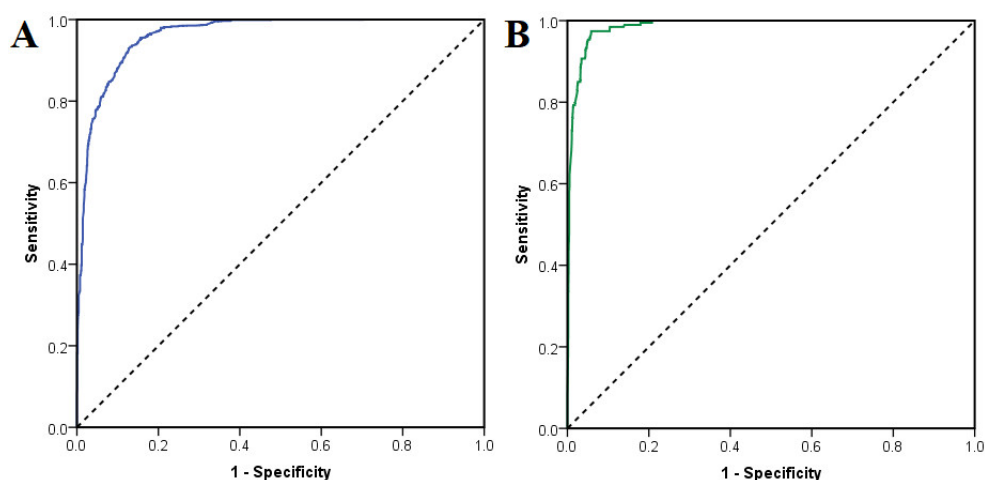

**Figure S3.** ROC curves showing discriminant capacity of average activity scores. (A) activity scores for predicting antagonists (Score-ANT); (B) activity scores for predicting agonists (Score-AG).

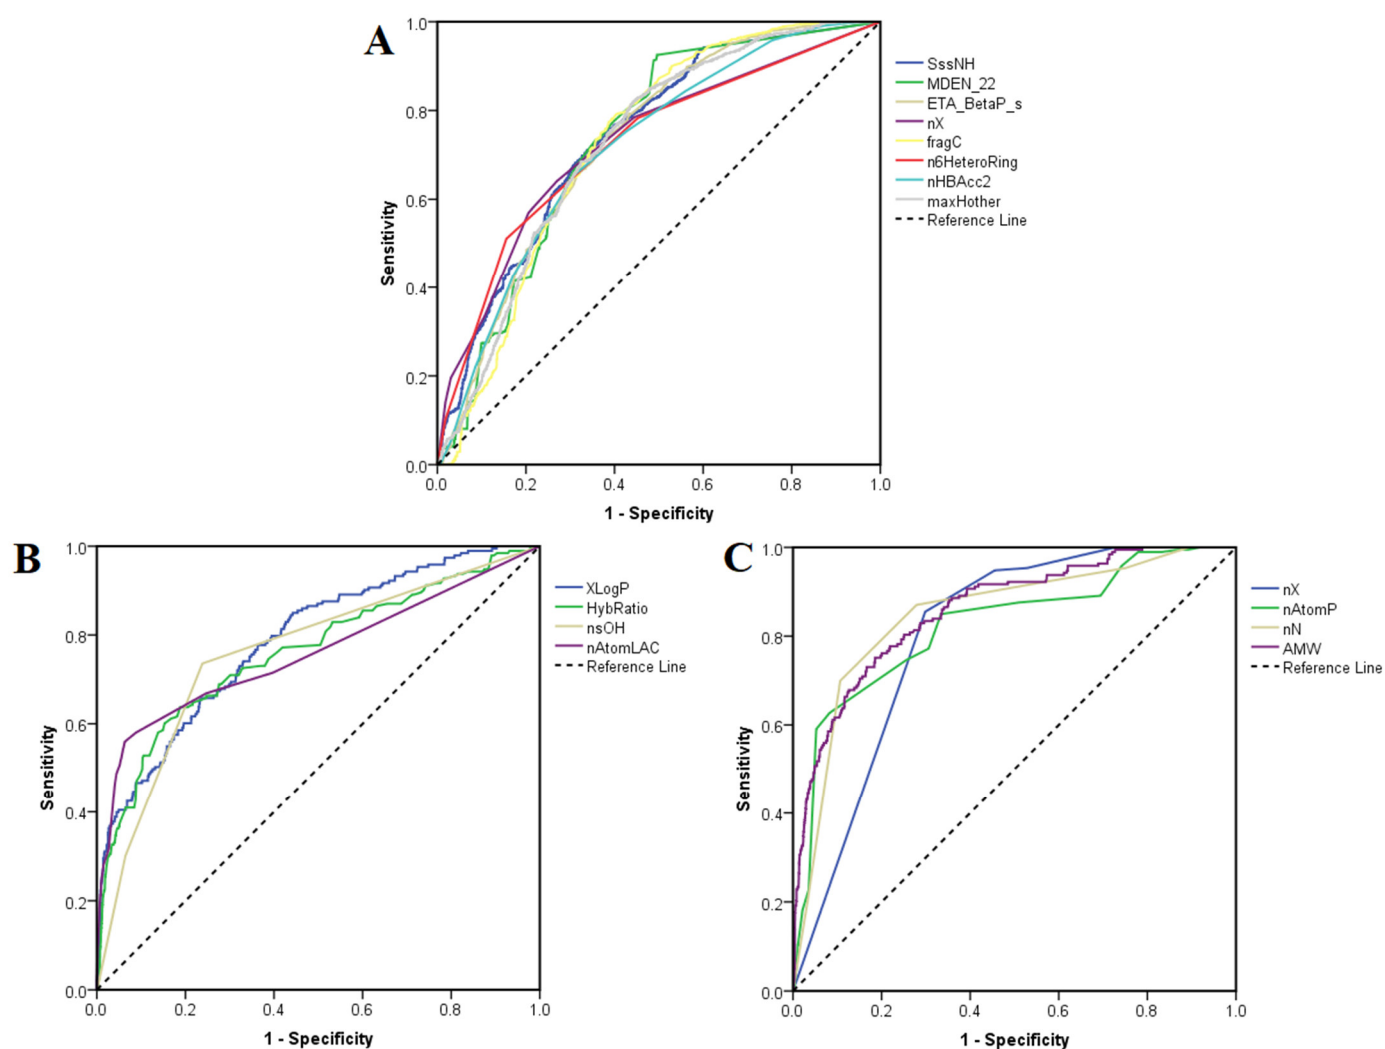

**Figure S4.** ROC curves showing discriminant capacity of each selected descriptor. (A) descriptors included for antagonists classification (larger values indicate more positive test result); (B) descriptors included for agonists classification, with higher values indicating more positive test result; (C) descriptors included for agonists classification, with lower values indicating more positive test result.

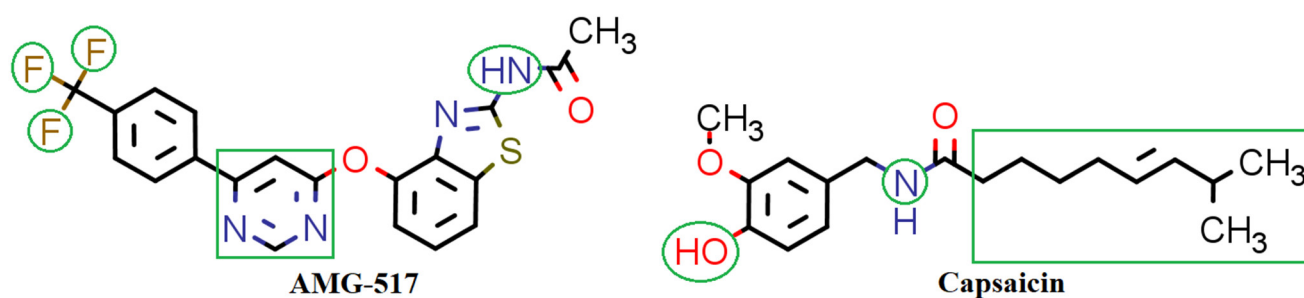

**Figure S5.** Chemical structures of TRPV1 antagonist AMG-517 and TRPV1 agonist capsaicin.

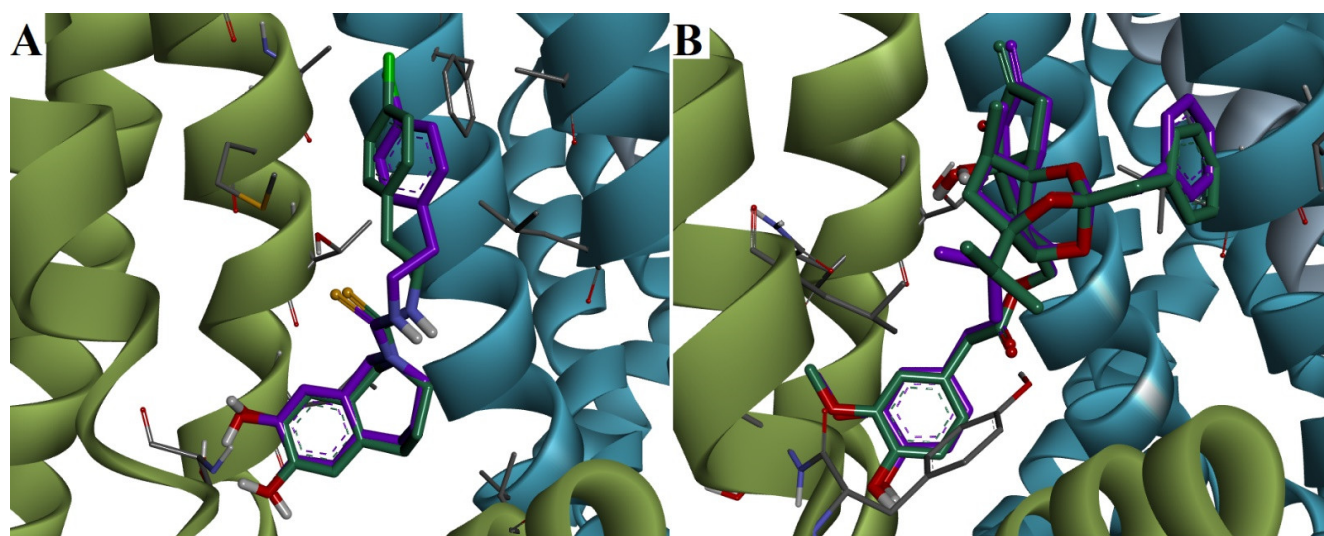

**Figure S6.** Validation of binding pose prediction. (A) superposition between predicted (purple) and experimental (green) conformations for CPZ; (B) superposition between predicted (purple) and experimental (green) conformations for RTX.

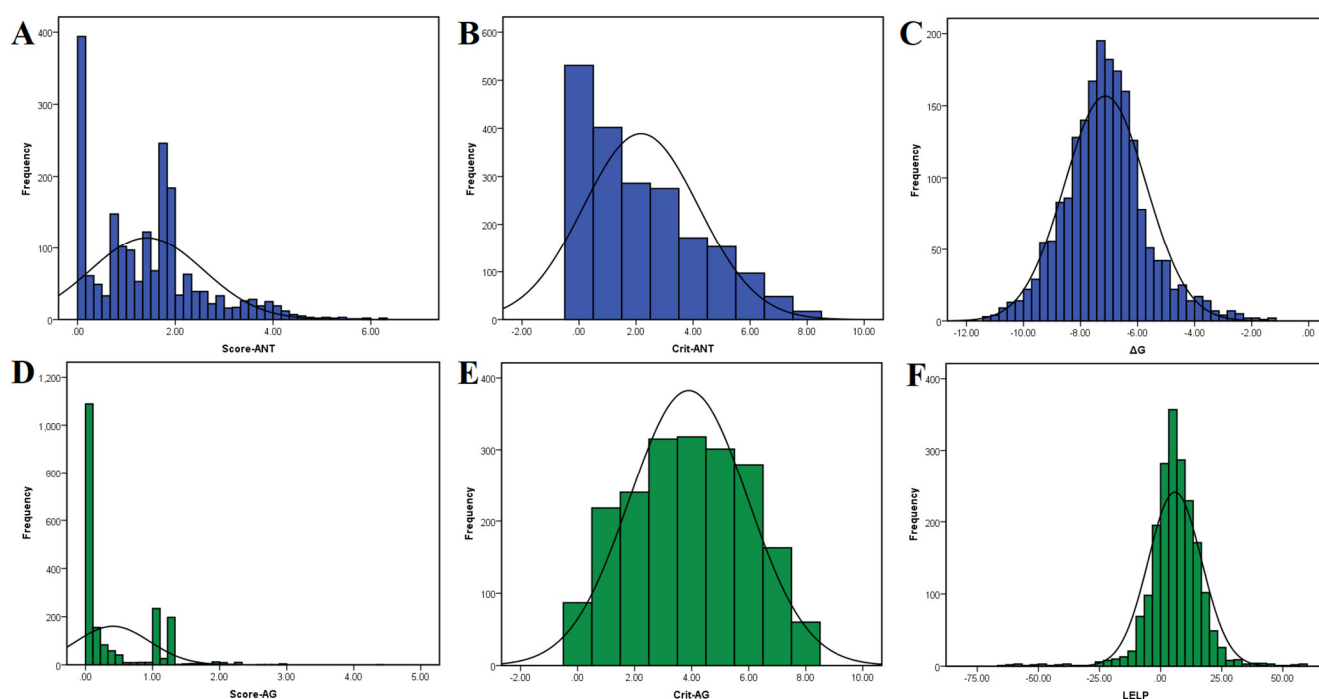

**Figure S7.** Distribution of input variables established for approved drugs (DrugBank). (A) distribution of average activity scores for predicting antagonists (Score-ANT); (B) distribution of number of satisfied molecular descriptor criteria for predicting antagonists (Crit-ANT); (C) distribution of

binding energies for predicting antagonists ( $\Delta G$ ); (**D**) distribution of average activity scores for predicting agonists (Score-AG); (**E**) distribution of number of satisfied molecular descriptor criteria for predicting agonists (Crit-AG); (**F**) distribution of calculated LELP values for predicting antagonists.
